# Supplementary material for: Carnitine Intake and Serum Levels Associate Positively with Postnatal Growth and Brain Size at Term in Very Preterm Infants
Source: MDPI journal article supplement (doi:10.3390/nu14224725), 2022-11-09
Supplement: s1 [file s1]

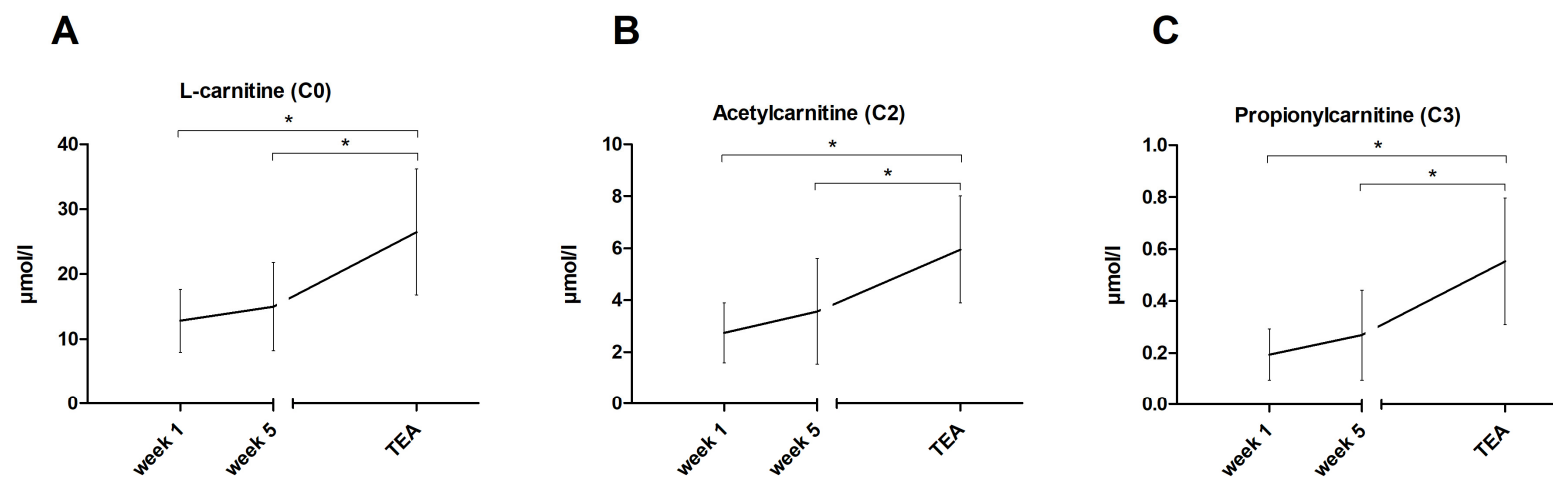

Figure S1. Serum concentrations of free carnitine (A) and short-chain acylcarnitine (B and C) levels at postnatal week 1, postnatal week 5, and term-equivalent age (TEA) in very preterm infants. Changes over time were tested using a linear mixed model, \*  $p < 0.05$ .
